# Supplementary material
Source: PubMed Central journal article supplement (PMC3982773)
Supplement: supp_pp.114.235598_235598supp.pdf [file supp_pp.114.235598_235598supp.pdf]

## Supplemental data

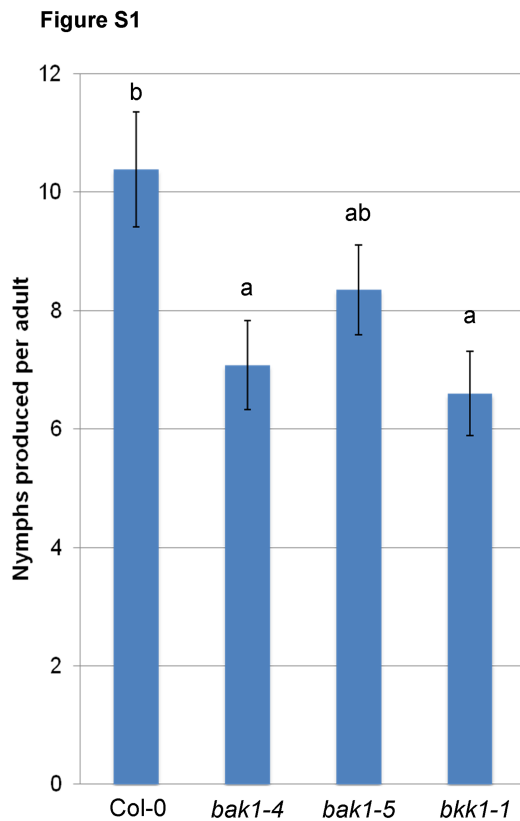

**Figure S1. GPA reproduction on *bak1* and *bkk1* Arabidopsis mutants.**

Bars show the means  $\pm$  SE of GPA nymph produced over a 14-day period on 5 plants per genotype of three independent experiments.

Different letters above the bars indicate significant differences at  $P < 0.05$  ( $n = 15$ ,  $F_{3,59} = 3.998$ ; t probabilities calculated within GLM).

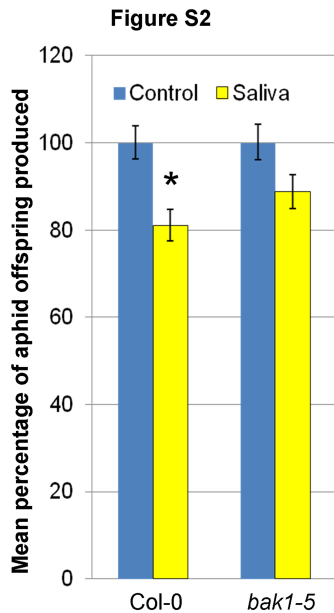

**Figure S2. Induced resistance in Arabidopsis to the 3-10 kDa fraction of GPA saliva is BAK1 dependent.** Bars show the means  $\pm$  SE of total nymphs produced per plant of three independent experiments ( $n = 10$  per experiment). Nymph counts were normalized with water (control) set at 100%.  $*P < 0.001$  (wild type Col-0  $F_{1,59} = 12.224$ ) and  $P = 0.052$  (*bak1-5* mutant,  $F_{1,59} = 3.773$ ).

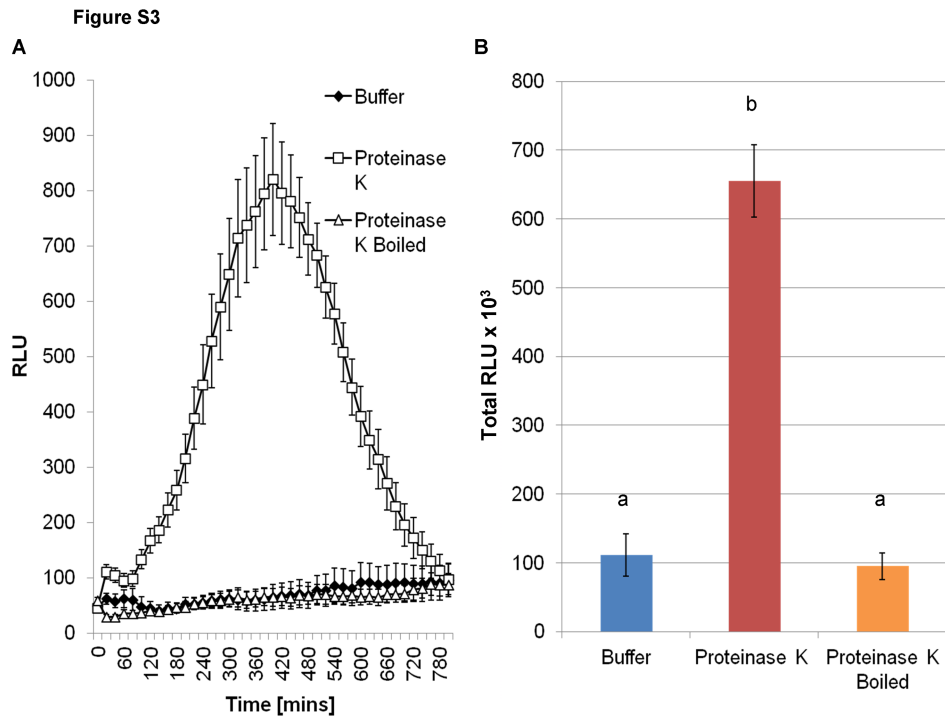

**Figure S3. Proteinase K triggers a ROS burst in Arabidopsis.**

ROS bursts were measured over a 600 min period. Bars show means  $\pm$  SE of  $n = 16$  leaf discs per replicate. Data of one representative experiment is shown. The experiment was repeated three times with similar results. Letters indicates significant differences at  $P < 0.01$  using ANOVA.

Table S1. Primers used in this study.

| <b>Gene name</b> | <b>Identifier</b> | <b>Use in study</b> | <b>Sequence (5' -&gt; 3')</b>                      |
|------------------|-------------------|---------------------|----------------------------------------------------|
| GAPDH            | At1g13440         | Reference gene      | F AGGTCAAGCATTTCGATGC<br>R AACGATAAGGTCAACGACACG   |
| TIP41            | At4g34270         | Reference gene      | F TCCATCAGTCAGAGGCTTCC<br>R AAGAAAGCTCATCGGTACGC   |
| FRK1             | At2g19190         | Marker gene         | F ATCTTCGCTTGGAGCTTCTC<br>R TGCAGCGCAAGGACTAGAG    |
| CYP81F2          | At5g57220         | Marker gene         | F AATGGAGAGAGCAACACAATG<br>R ATACTGAGCATGAGCCCTTTG |
| PAD3             | At3g26830         | Marker gene         | F TGCTCCCAAGACAGACAATG<br>R GTTTTGGATCACGACCCATC   |
